# Supplementary material
Source: publisher site journal article supplement (https://www.spandidos-publications.com/2383/downloadSupplementary)

Figure S1. Comparison of the relative expression of lncRNA ANRIL among patients with relapsed/refractory and *de novo* AML and healthy donors. Comparisons were performed by Wilcoxon's rank-sum test. lncRNA, long non-coding RNA; ANRIL, antisense noncoding RNA in the INK4 locus; AML, acute myeloid leukemia.

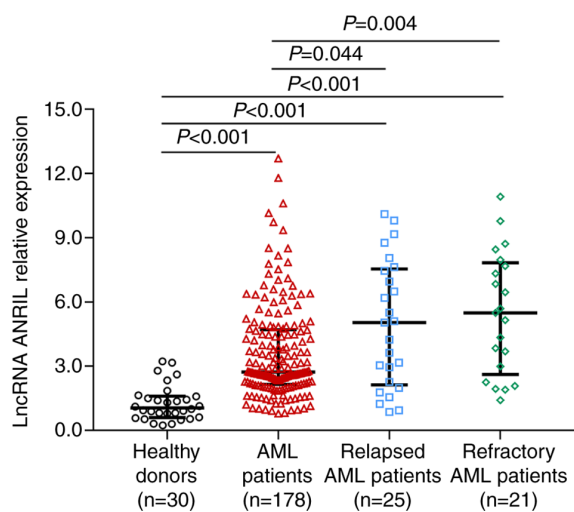

Supplement: Supplementary file 1 [file downloadSupplementary]
